# Supplementary material for: Linearly polarized electroluminescence from ionic iridium complex-based metallomesogens: the effect of aliphatic-chain on their photophysical properties
Source: Royal Society of Chemistry journal article supplement (doi:10.1039/c7tc05421a), 2018-01-01
Supplement: c7tc05421a1.pdf [file c7tc05421a1.pdf]

## ***Supporting information***

# **Linearly Polarized Electroluminescence from Ionic Iridium Complex-based Metallomesogens: The Effect of Aliphatic-Chain on Their Photophysical Properties**

Xiugang Wu,<sup>†</sup> Guohua, Xie, <sup>||</sup> Christopher P. Cabry,<sup>&</sup> Xiaoyu Xu,<sup>‡</sup> Stephen J. Cowling,<sup>&</sup>

Duncan W. Bruce,<sup>&\*</sup> Weiguo Zhu,<sup>†</sup> Etienne Baranoff,<sup>‡\*</sup> Yafei Wang,<sup>†\*</sup>

<sup>a</sup> *Jiangsu Key Laboratory of Environmentally Friendly Polymeric Materials, School of Materials Science & Engineering, Changzhou University, Changzhou 213164, PR China*

<sup>b</sup> *School of Chemistry, University of Birmingham, Birmingham B15 2TT, UK*

<sup>c</sup> *Department of Chemistry, University of York, Heslington, York, YO10 5DD.*

<sup>d</sup> *Department of Chemistry, Hubei Key Lab on Organic and Polymeric Optoelectronic Materials, Wuhan University, Wuhan 430072, People's Republic of China.*

## ***Corresponding author***

Yafei Wang: qiji830404@hotmail.com

Duncan W. Bruce: duncan.bruce@york.ac.uk

Etienne Baranoff: eb.chimie@gmail.com

## Contents

**Figure S1** TGA curves of **7a** and **7b**

**Figure S2.** DSC traces of **7a** and **7b**

**Figure S3.** Photomicrographs of (a) **7a** at 225 °C on cooling, (b) **7b** at 174 °C on cooling

**Figure S4.** Photomicrographs of **7b** at 171°C on cooling process after shearing

**Figure S5.** Luminescence decay time of complex in solution (a) and neat film (b) after degassed

**Figure S6.** Emission spectra of **7b** in THF–water mixtures

**Figure S7.** Emission spectra of  $[\text{Ir}(\text{ppy})_2(\text{deeb})][\text{PF}_6]$  in THF–water mixtures

**Figure S8.** The emission of complex **7a** under UV light (365 nm) at room temperature

**Figure S9.** SEM images of **7a**, prepared in a THF–water mixture with (a) 30% and (b) 90% water content

**Table S1.** Electroluminescent data of EL devices

## NMR spectra and MALDI-MS spectra

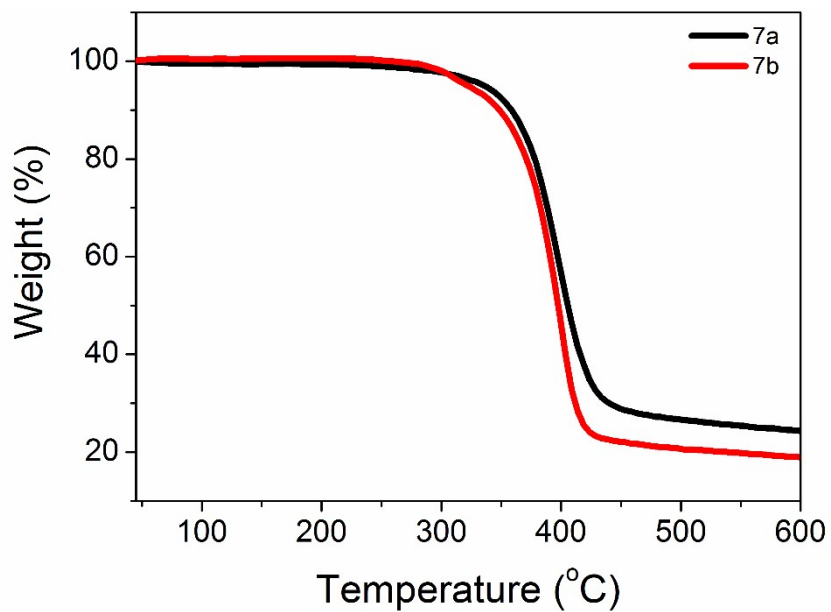

**Figure S1.** TGA curves of **7a** (black) and **7b** (red) measured at heating rate 10 °C/min under N<sub>2</sub>

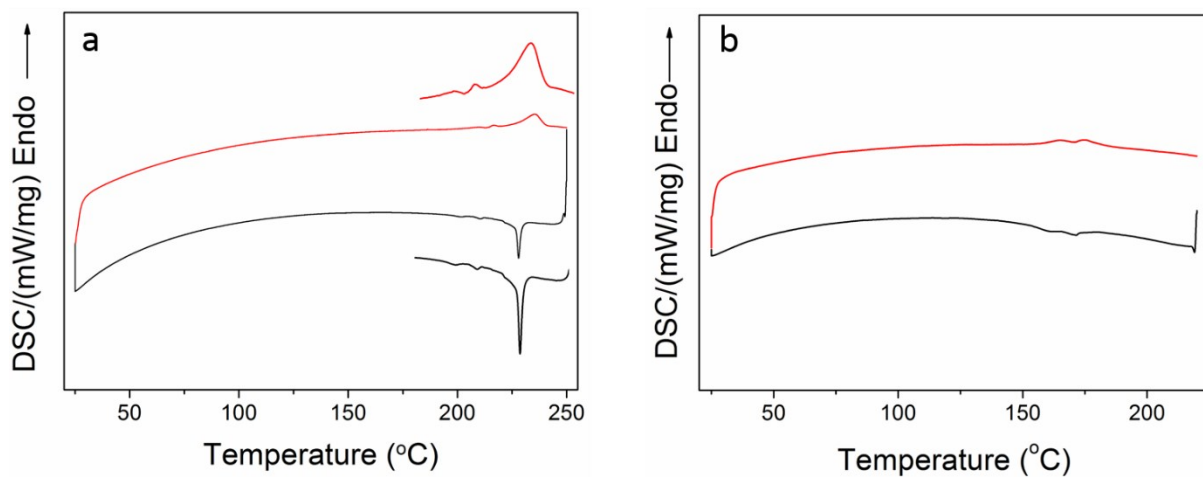

**Figure S2.** DSC traces of (a) **7a** and (b) **7b** (black: first cooling curve, scan: 10 °C/min; red: second heating curve, scan: 10 °C/min).

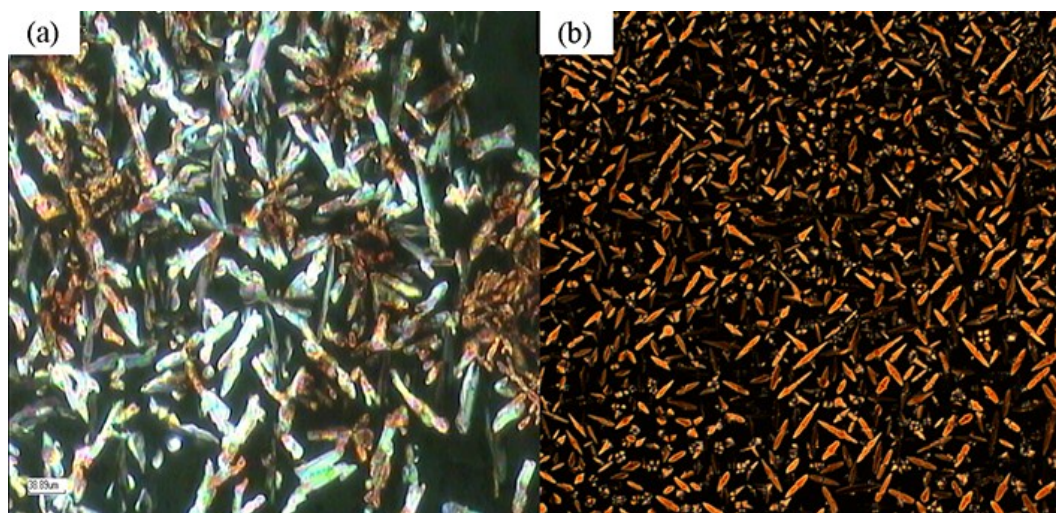

**Figure S3.** Photomicrographs of (a) **7a** at 225 °C on cooling, (b) **7b** at 174 °C on cooling.

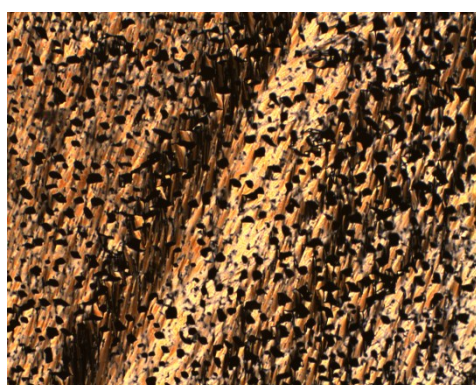

**Figure S4.** Photomicrographs of 7b at 171°C on cooling process after shearing

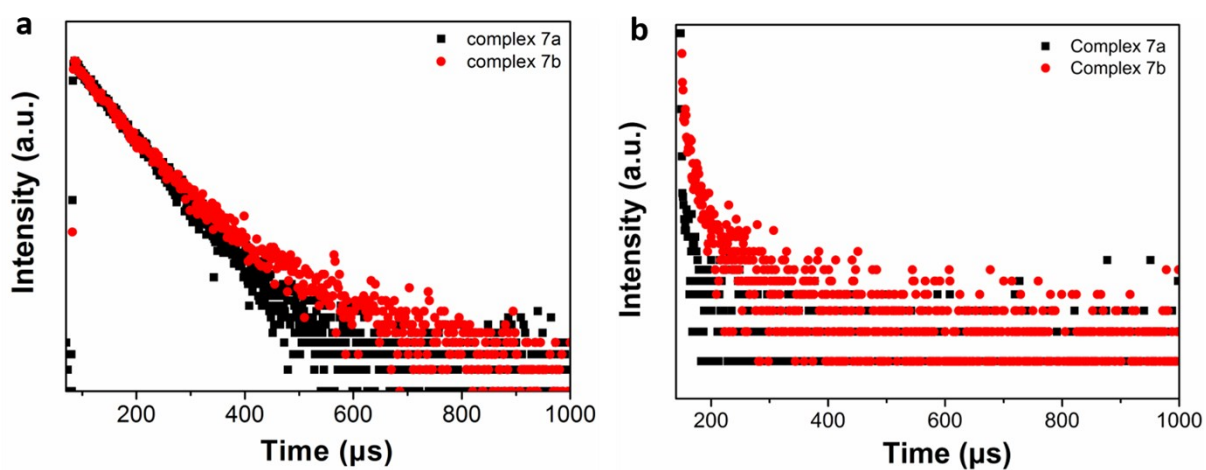

**Figure S5.** Luminescence decay time of complex in solution (a) and neat film (b) after degassed

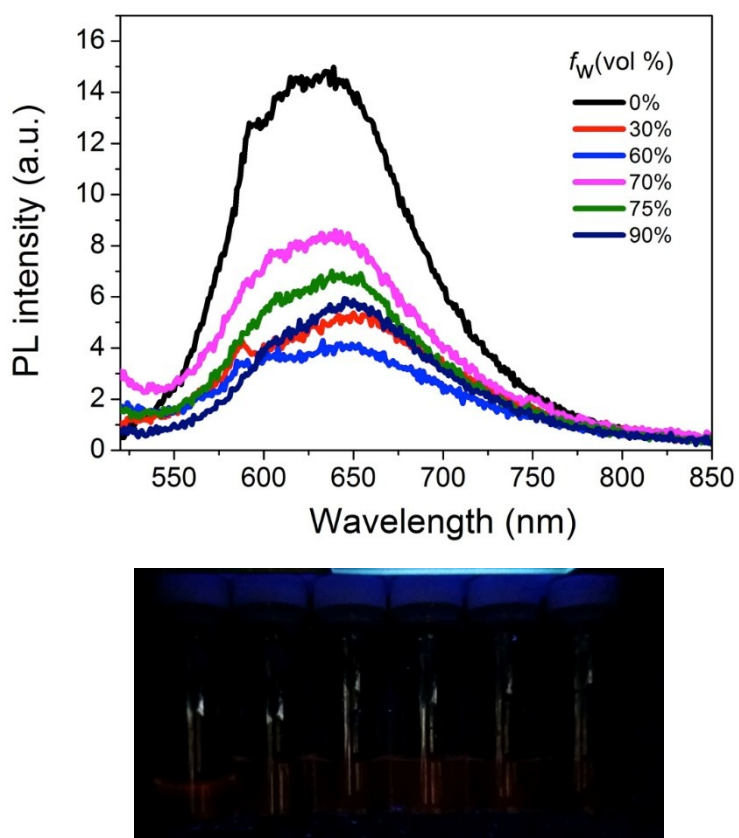

**Figure S6.** Emission spectra of **7b** in THF–water mixtures. The concentration of pure THF is  $10^{-4}$  M. Excitation wavelength is 510 nm. Photographs of **7b** in THF–water mixtures with different  $f_w$  values (from left to right: 0%, 30%, 60%, 70%, 75% and 90%) taken under UV illumination at 365 nm.

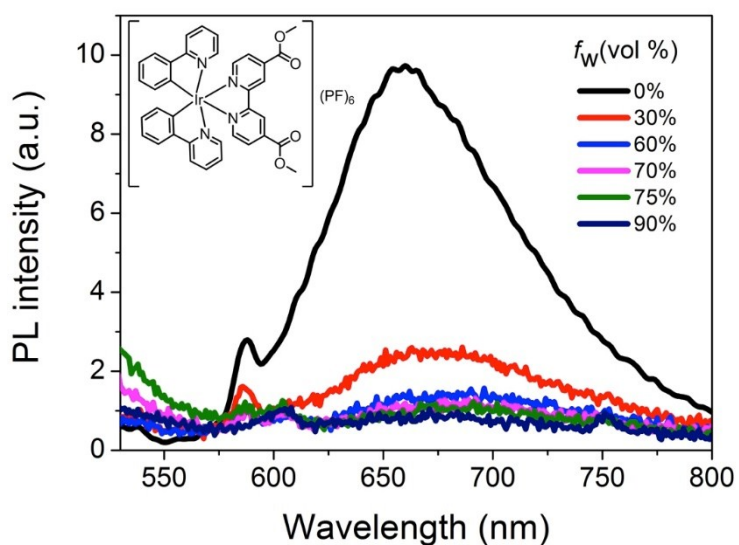

**Figure S7.** Emission spectra of  $[\text{Ir}(\text{ppy})_2(\text{deeb})][\text{PF}_6]$  in THF–water mixtures. The concentration of pure THF is  $10^{-4}$  M. Excitation wavelength is 510 nm.

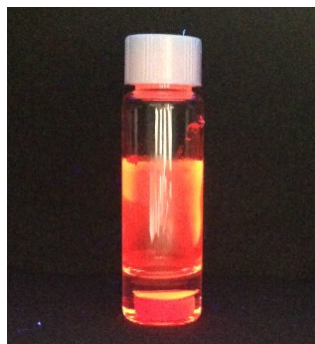

**Figure S8** The emission of complex **7a** under UV light (365 nm) at room temperature. The solution is the CH<sub>2</sub>Cl<sub>2</sub>:hexane (V/V = 1:1, 10<sup>-3</sup> M). After the CH<sub>2</sub>Cl<sub>2</sub> volatilized, the sample was self-assembled in hexane solution

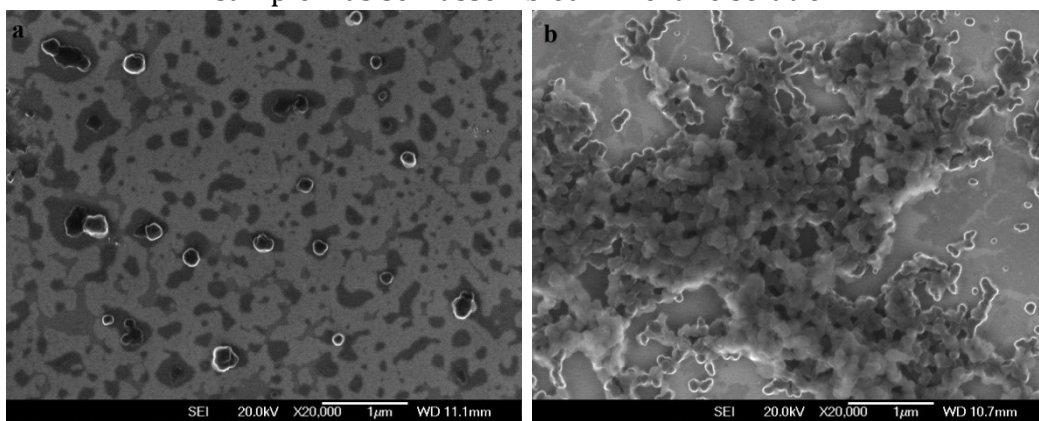

**Figure S9.** SEM images of **7a**, prepared in a THF–water mixture with (a) 30% and (b) 90% water content.



## NMR spectra and MALDI-MS spectra

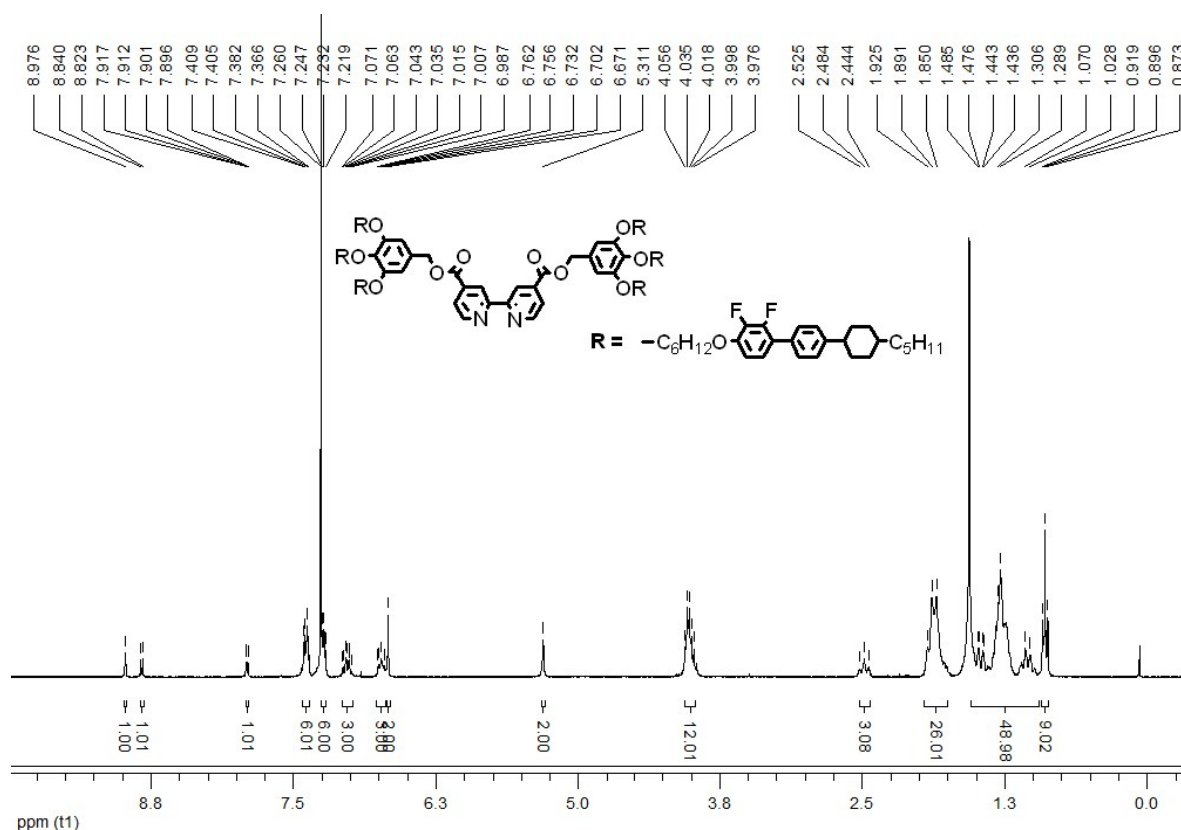

**Figure S7.** <sup>1</sup>H NMR spectra of **6a** in CDCl<sub>3</sub>

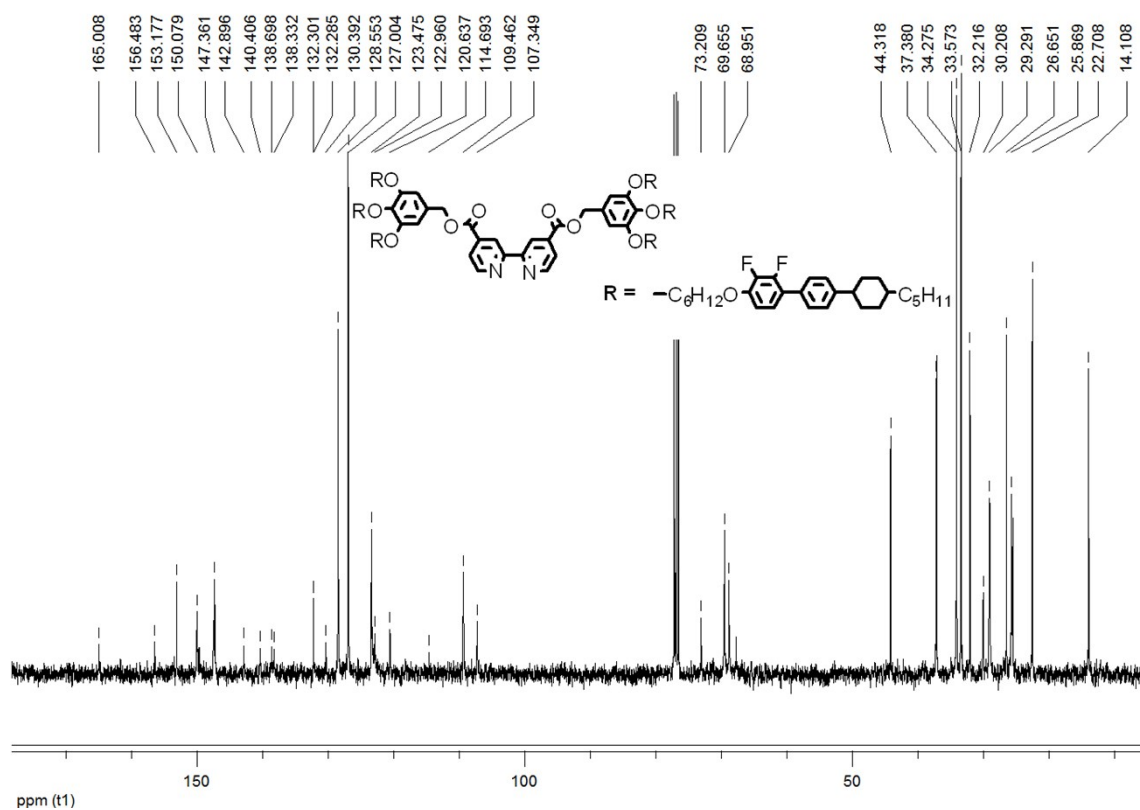

**Figure S8.** <sup>13</sup>C NMR spectra of **6a** in CDCl<sub>3</sub>

## MALDI-TOF, CCA, 6A-C6, 20180124

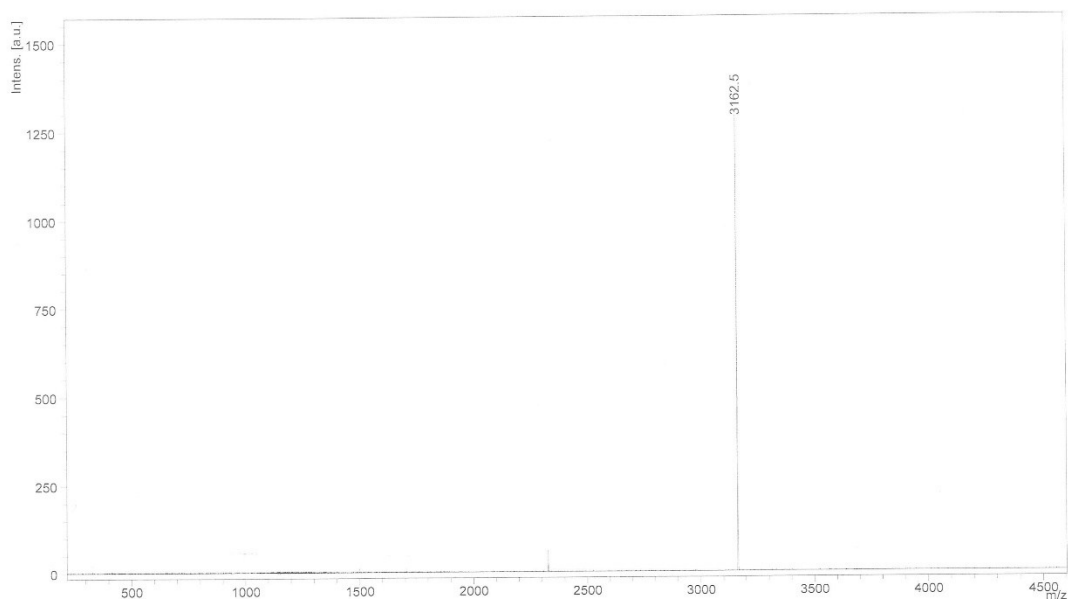

## MALDI-MS spectra of ligand 6a

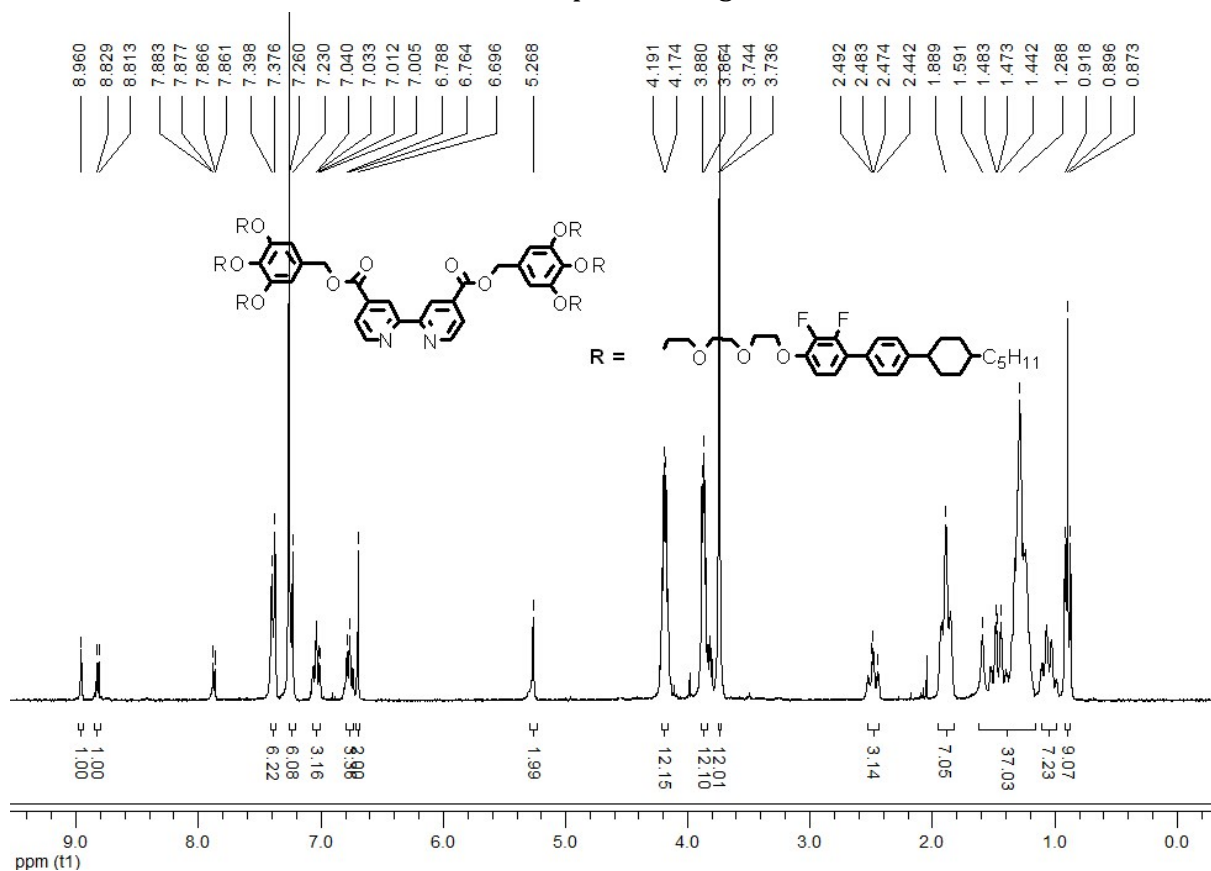Figure S9. <sup>1</sup>H NMR spectra of **6b** in CDCl<sub>3</sub>



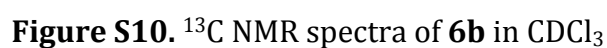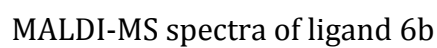

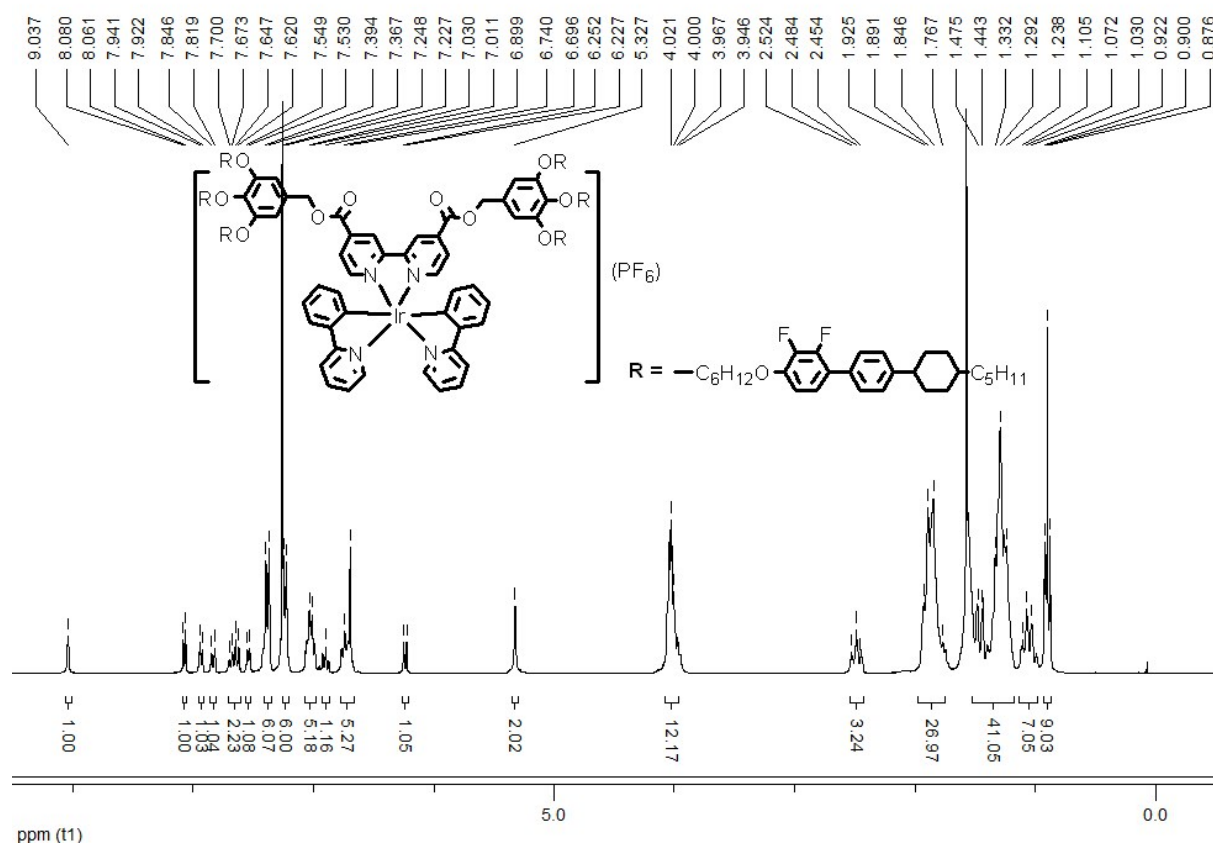

**Figure S11.** <sup>1</sup>H NMR spectra of **7a** in CDCl<sub>3</sub>

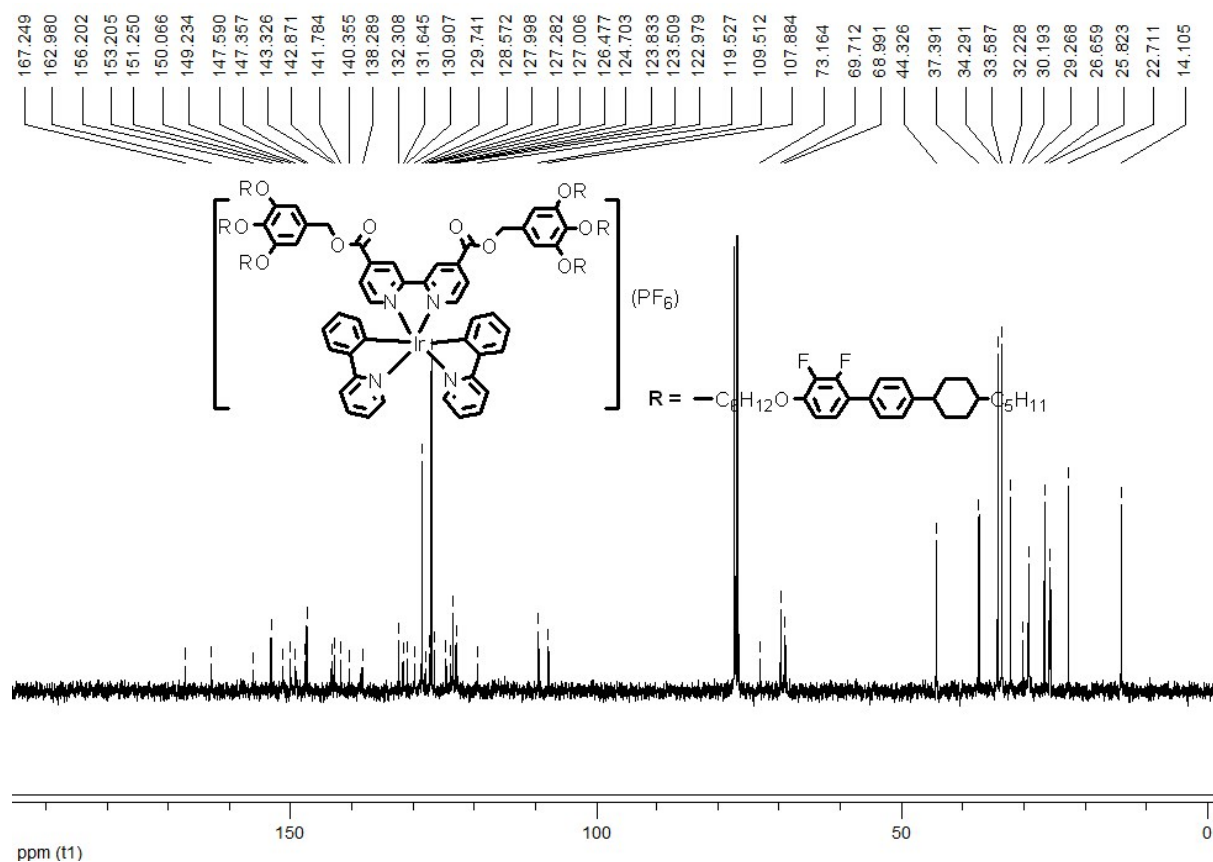

**Figure S12.** <sup>13</sup>C NMR spectra of **7a** in CDCl<sub>3</sub>

MALDI-MS spectra of ligand 7a

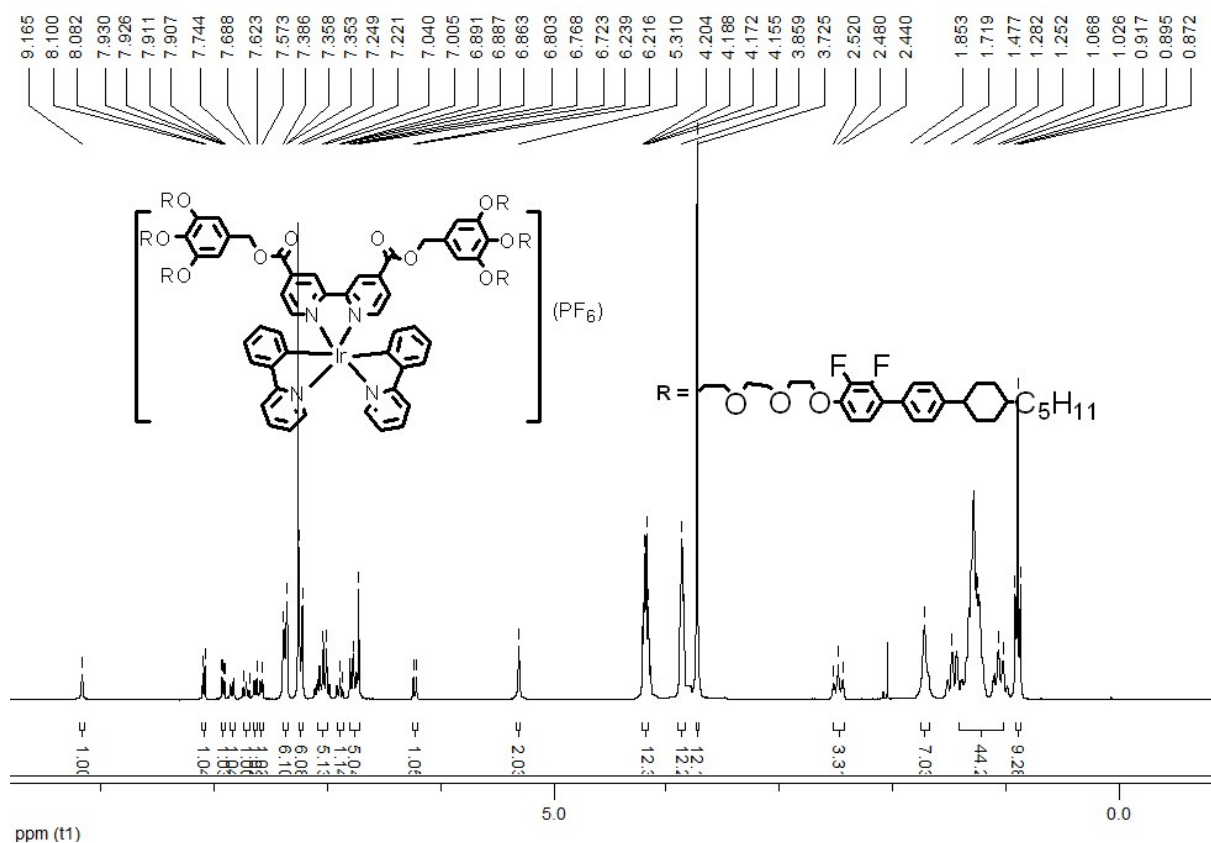

**Figure S13.**  $^1\text{H}$  NMR spectra of **7b** in  $\text{CDCl}_3$

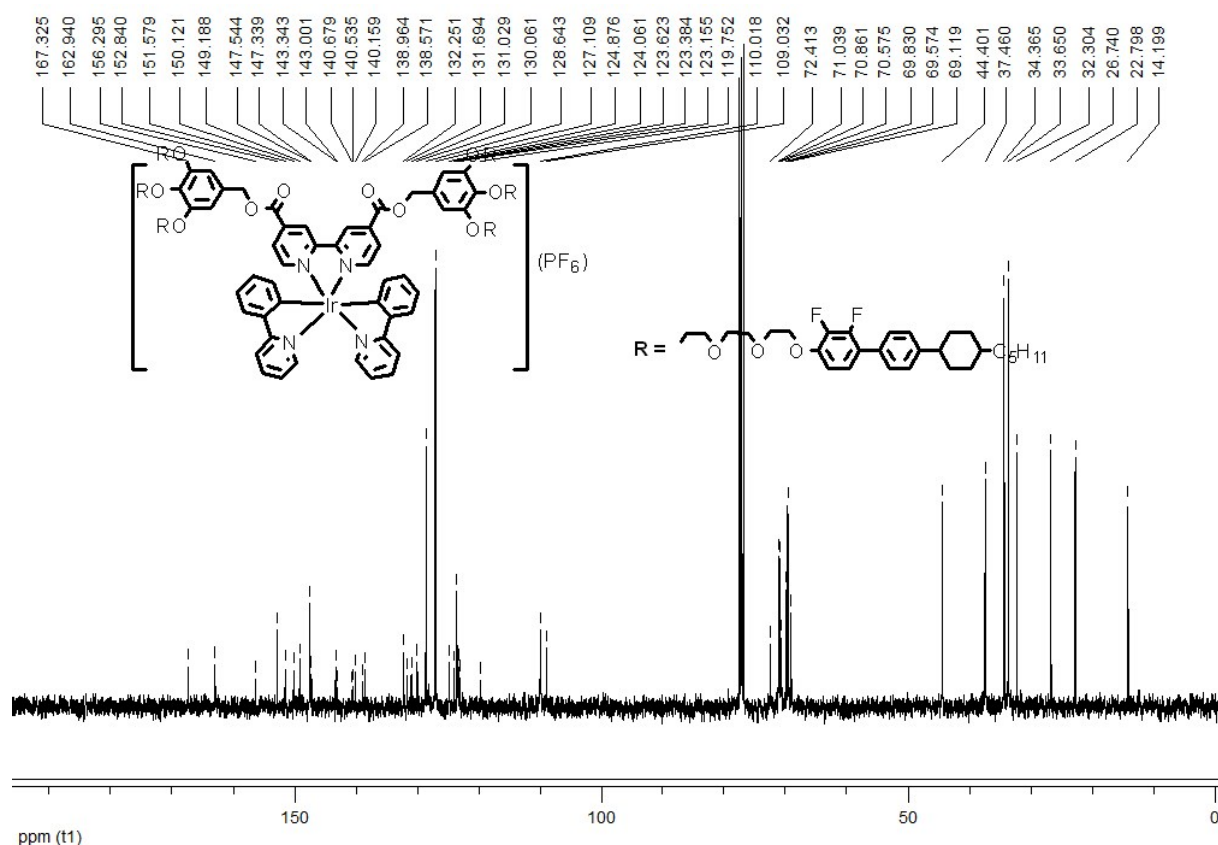

**Figure S14.**  $^{13}\text{C}$  NMR spectra of **7b** in  $\text{CDCl}_3$

D:\DATA\2018\201801\20180124\20180124-9 7B-C6\0\_K6\1

MALDI-TOF,CCA,7B-C6,20180124

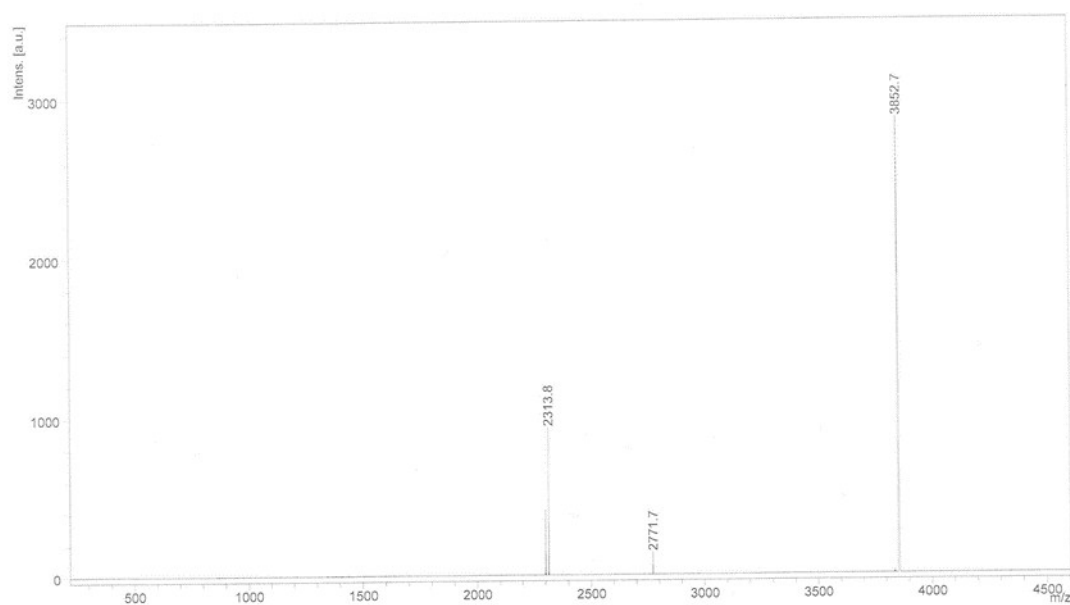

MALDI-MS spectra of ligand **7b**

**Table S1.** Electroluminescent data of EL devices.

| Devices    | Complex | Emission<br>/nm | <i>R</i> | Luminance<br>/cd m <sup>-2</sup> | Current efficiency<br>/cd A <sup>-1</sup> | EQE<br>% | <i>V</i> <sub>turn-on</sub><br>V |
|------------|---------|-----------------|----------|----------------------------------|-------------------------------------------|----------|----------------------------------|
| <b>I</b>   | 7a      | 640             | N/A      | 2.5                              | 0.01                                      | 0.03     | 8.8                              |
|            | 7b      | 647             | 1.1      | 2                                | 0.04                                      | 0.01     | 9.2                              |
| <b>II</b>  | 7a      | 661             | 1.4      | 20                               | 0.57                                      | 0.85     | 6                                |
|            | 7b      | 707             | 1.1      | 2                                | 0.1                                       | 0.36     | 12                               |
| <b>III</b> | 7a      | 641             | 1.2      | 5                                | 1.1                                       | 1.1      | 8.5                              |
|            | 7b      | 642             | N/A      | 34                               | 0.1                                       | 0.09     | 5                                |
| <b>IV</b>  | 7a      | 640             | 1.1      | 4                                | 0.03                                      | 0.04     | 12                               |
|            | 7b      | 678/660         | 4        | 1.2                              | 0.01                                      | 0.01     | 5.5                              |
